# Supplementary material
Source: publisher figshare collection journal article supplement (https://karger.figshare.com/articles/dataset/_/5129350)
Supplement: Supplementary file 1 [file 1 › 000443789_sm_Figure_1.pdf]

**Supplementary figure 1. Matched Q-albumin values based on two different serum albumin values**

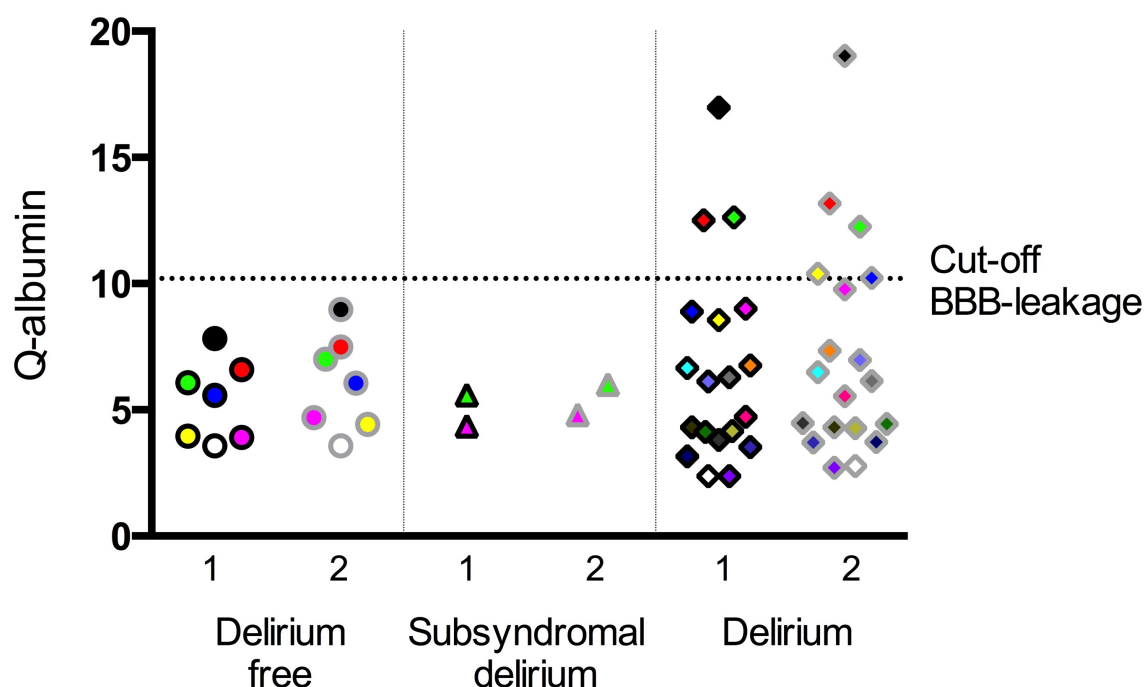

**Figure legend**

CSF and serum was not collected at the exact same time, and in twenty-eight patients serum albumin was analysed more than once pre-operatively. This figure shows for each group of patients (categorized according to delirium status) the Q-albumin values calculated in two ways (same colour = same individual):

- 1: Q-albumin values based on the first available serum-albumin value
- 2: Q-albumin values based on the serum-albumin values taken closest in time prior to the CSF sampling (i.e. the values used in the paper)

The reference line shows cut-off of Q-albumin 10.2 used in the paper as a marker for blood-CSF barrier dysfunction, illustrating that the Q-albumin values are quite stable irrespective of albumin value chosen. The mean difference between the first and second Q-albumin value was 0.6 (95%CI 0.4-0.8).
