# Supplementary material
Source: publisher figshare collection journal article supplement (https://karger.figshare.com/articles/dataset/_/5129350)
Supplement: Supplementary file 1 [file 1 › 000443789_sm_Figure_2.pdf]

**Supplementary figure 2. Relationship between serum albumin concentrations and time from serum to CSF sampling**

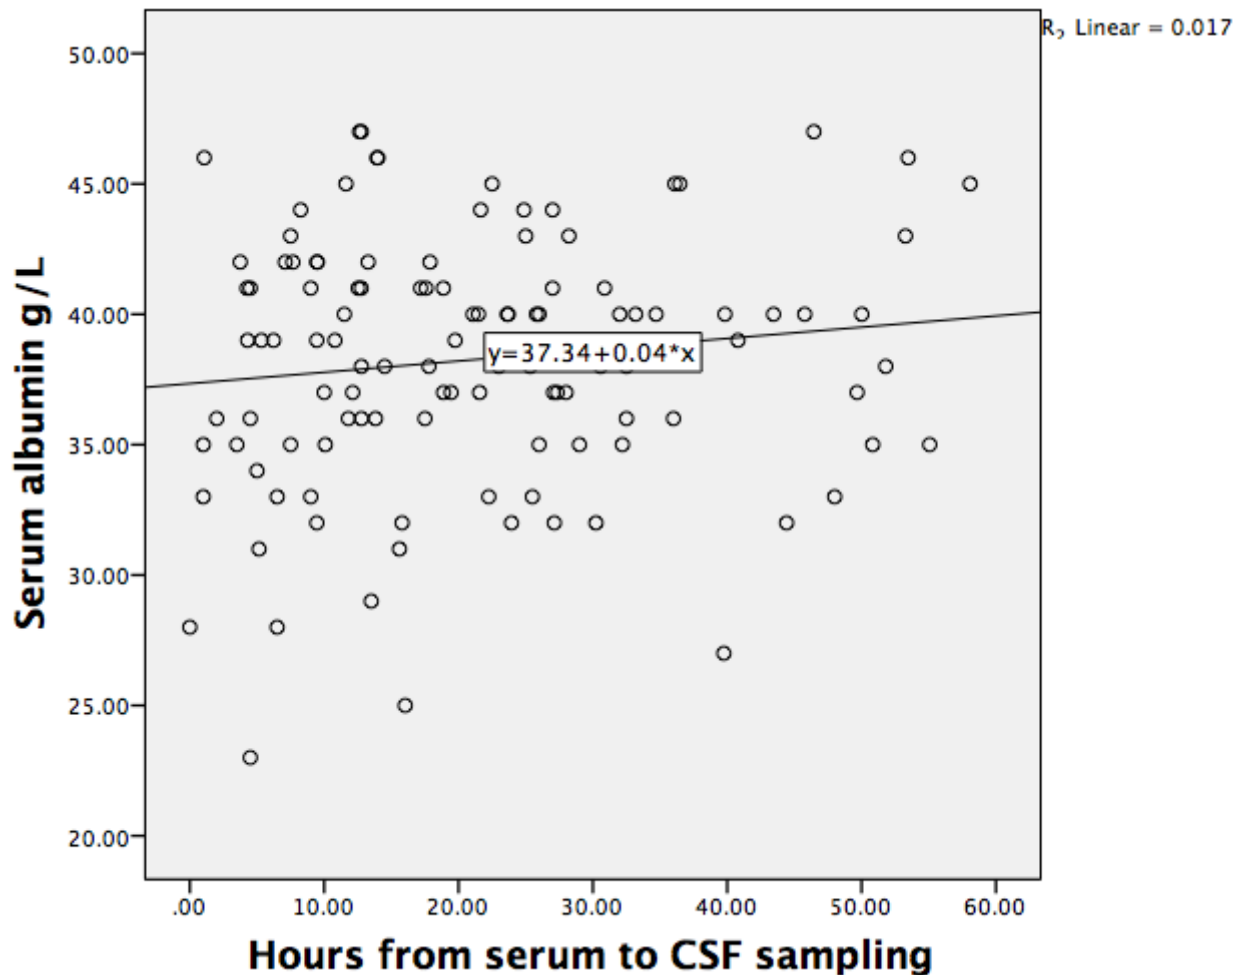

**Figure legend**

All serum albumin values were plotted with the time from serum to CSF sampling. There was no significant correlation (Spearman correlation coefficient: 0.090,  $P=0.166$ ), suggesting no general trend of albumin changes in this timeframe in the population as a whole.
